# Supplementary material for: On the Myths of Indicator Species: Issues and Further Consideration in the Use of Static Concepts for Ecological Applications
Source: PLoS One. 2013 Oct 16;8(10):e78219. doi: 10.1371/journal.pone.0078219 (PMC3797757; doi:10.1371/journal.pone.0078219)
Supplement: Appendix S4 — Data on sediment median grain size and organic content linked with the abundance of selected species and their salinity ranges of the Mediterranean Sea. (XLSX) [file pone.0078219.s004.xlsx]

## Sheet: summary
Mediterranean		LOI			d50
data set	provider	meso	poly	eu	meso	poly	eu
Sardinia	Magni, Paolo	38	24	14	38	24	14
Venice	Tagliapietra, Davide	22	103	160	22	103	160
overall		60	127	174	60	127	174

## Sheet: mesohaline
Station	loi	d50	psu	depth	Cerastoderma_glaucum	Hediste_diversicolor	Neanthes_succinea
Sardinia_1	12.7	5	10	1.3	23.1481	0	115.741
Sardinia_10	12.4	3.6	14	1.9	46.2963	0	92.5926
Sardinia_11	11.5	4.3	14	2	185.185	23.1481	162.037
Sardinia_12	10.2	4.4	14	1.9	1527.78	69.4444	69.4444
Sardinia_13	10.3	4.4	14	1.9	347.222	0	0
Sardinia_14	11.6	4.3	16	1.7	162.037	0	46.2963
Sardinia_15	10.6	4.8	14	2.1	1921.3	0	23.1481
Sardinia_16	11.6	4.2	14	1.9	509.259	0	115.741
Sardinia_17	5.4	15.6	16	1.6	69.4444	0	324.074
Sardinia_18	12.9	3.7	16	1.5	46.2963	0	300.926
Sardinia_19	11.7	5	9.2	1.3	401.235	15.4321	46.2963
Sardinia_2	12.8	4.6	10	1.5	23.1481	23.1481	324.074
Sardinia_20	13.3	3.8	8.1	1.8	385.802	15.4321	77.1605
Sardinia_21	11.4	4.6	13.4	1.9	354.938	0	0
Sardinia_22	10.5	5	11.8	1.3	555.556	46.2963	509.259
Sardinia_23	11.6	3.8	14.1	1.8	123.457	324.074	478.395
Sardinia_24	10.8	4.6	14.4	1.9	771.605	46.2963	200.617
Sardinia_25	16.3	5	15.8	1.3	92.5926	108.025	663.58
Sardinia_3	11	4.3	10	1.8	23.1481	23.1481	185.185
Sardinia_31	13.6	5	13.8	1.3	15.4321	108.025	462.963
Sardinia_4	10.9	3.6	12	1.8	300.926	46.2963	277.778
Sardinia_48	9.6	15.3	10	1.3	0	115.75	1898.3
Sardinia_49	14.3	4.4	10	2	0	0	231.5
Sardinia_5	12.4	3.7	12	1.8	46.2963	115.741	555.556
Sardinia_50	8.8	9.6	10	1.8	0	23.15	324.1
Sardinia_51	12	3.8	10	1.8	0	138.9	671.35
Sardinia_52	10.2	3.9	12	1.5	0	231.5	1967.75
Sardinia_53	11.2	4	12	1.3	0	115.75	1018.6
Sardinia_54	12	3.7	12	1.8	0	185.2	324.1
Sardinia_55	7.3	5.8	12	1.6	0	254.65	1203.8
Sardinia_56	10.6	16.7	16	1.7	0	46.3	902.85
Sardinia_57	12.7	3.3	16	1.9	0	0	23.15
Sardinia_58	6.7	4	14	1.3	0	347.25	1389
Sardinia_6	9	6.6	12	2	23.1481	0	115.741
Sardinia_68	15.3	5	14.3	1.3	0	123.456	617.28
Sardinia_7	11.9	3.8	12	1.8	208.333	92.5926	115.741
Sardinia_8	11.4	3.3	12	1.8	23.1481	300.926	324.074
Sardinia_9	12.5	3.7	12	1.9	532.407	46.2963	162.037
Venice_201	8.74	56	18	0.75	0	0	0
Venice_206	6.11	60	17	0.75	0	0	0
Venice_216	6.4	39	17	0.4	0	30	0
Venice_217	6.4	39	16	0.4	10	310	0
Venice_234	4.12	103	12	2	100	50	0
Venice_236	3.98	58	10	2	60	30	0
Venice_238	8.43	69	7	2	0	160	10
Venice_239	8.43	69	6	2	0	320	0
Venice_240	8.43	69	6	2	10	470	10
Venice_241	8.43	69	6	2	0	0	0
Venice_242	9.63	65	6	2	0	0	0
Venice_243	9.63	65	4	2	0	0	0
Venice_244	9.63	65	8	2	0	0	0
Venice_245	6.82	41	11	2	0	0	0
Venice_246	6.82	41	4	2	0	0	0
Venice_247	6.82	41	5	2	0	10	0
Venice_248	6.82	41	4	2	0	10	0
Venice_249	6.82	41	5	2	0	10	0
Venice_250	6.82	41	5	2	0	0	0
Venice_251	6.82	41	10	2	0	40	0
Venice_252	6.82	41	13	2	0	20	0
Venice_253	6.82	41	15	2	0	40	0

## Sheet: polyhaline
Station	loi	d50	psu	depth	Cerastoderma_glaucum	Hediste_diversicolor	Neanthes_succinea
Sardinia_26	13	3.8	18.8	1.8	46.2963	300.926	1388.89
Sardinia_27	13.9	4.6	20.4	1.9	277.778	0	254.63
Sardinia_28	18.2	3.8	26.9	1.8	30.8642	0	30.8642
Sardinia_29	18.2	3.8	23.9	1.8	15.4321	0	46.2963
Sardinia_30	14.3	4.6	24.5	1.9	15.4321	0	0
Sardinia_41	27.6	5	24.5	1.6	92.592	1805.54	0
Sardinia_42	16.9	7	25	1.7	15.432	0	0
Sardinia_43	18.2	6	30	1.8	61.728	92.592	0
Sardinia_59	9.9	5	21.4	1.3	0	185.184	848.76
Sardinia_60	8.7	3.8	24	1.8	0	92.592	254.628
Sardinia_61	10.2	4.6	25.8	1.9	0	0	0
Sardinia_62	15.5	5	25	1.3	0	77.16	401.232
Sardinia_63	22.1	3.8	27.1	1.8	0	0	0
Sardinia_64	13	4.6	27.9	1.9	0	0	0
Sardinia_65	17.3	5	24	1.3	0	61.728	570.984
Sardinia_66	17	4.6	27.5	1.9	0	0	0
Sardinia_67	14.8	5	22.9	1.3	0	15.432	462.96
Sardinia_69	18.4	3.8	21.1	1.8	0	15.432	0
Sardinia_70	16	4.6	21.2	1.9	0	0	0
Sardinia_71	13.3	5	18.2	1.3	0	77.16	462.96
Sardinia_72	13	3.8	19.4	1.8	0	15.432	92.592
Sardinia_73	12.9	4.6	21.4	1.9	0	0	0
Sardinia_74	18.8	3.8	20.2	1.8	0	0	0
Sardinia_75	15.7	4.6	21.9	1.9	0	0	61.728
Venice_1	1.9	12	27.3	0.7	0	692	0
Venice_175	0.48	122	29.3	0.5	0	0	0
Venice_176	0.51	106	29.1	0.1	0	0	0
Venice_177	0.51	124	29.9	0.4	0	0	0
Venice_178	0.67	58	28.7	0.2	8	0	0
Venice_179	0.73	41	28.7	2.9	0	0	0
Venice_180	0.89	18	28.8	0.4	0	12	4
Venice_183	7.07	106	26	0.75	400	20	0
Venice_184	7.07	106	27	0.75	210	0	0
Venice_186	11.34	74	29	0.75	10	10	0
Venice_189	4.24	57	23	0.75	0	0	0
Venice_190	4.24	57	25	0.75	10	0	0
Venice_191	4.24	57	24	0.75	0	0	0
Venice_194	4.24	57	27	0.75	40	20	0
Venice_195	4.24	57	25	0.75	70	120	0
Venice_2	2.37	14	26.9	0.4	0	1316	0
Venice_200	8.66	69	29	0.75	0	0	0
Venice_201	8.74	56	18	0.75	0	0	0
Venice_202	9.7	92	26	0.75	0	0	0
Venice_203	9.7	92	27	0.75	0	0	0
Venice_207	5.54	102	26	0.75	0	0	0
Venice_215	6.4	39	22	0.4	10	60	0
Venice_218	6.4	39	26	0.4	0	10	0
Venice_220	7.54	45	29	0.4	0	0	0
Venice_222	4.99	54	22	0.4	0	0	0
Venice_223	4.99	54	27	0.4	0	30	0
Venice_224	4.99	54	27	0.4	0	190	20
Venice_227	4.99	54	21	0.4	10	180	0
Venice_229	4.99	54	24	0.4	80	520	0
Venice_230	4.99	54	19	0.4	210	530	0
Venice_233	5.89	34	19	2	10	10	0
Venice_235	3.98	58	28	2	0	0	0
Venice_257	13.48	54	25	0.4	0	0	0
Venice_258	7.86	128	23	0.4	0	0	0
Venice_259	7.86	128	25	0.4	0	0	10
Venice_262	13.6	62	22	0.4	0	0	0
Venice_263	13.11	111	26	0.4	0	0	0
Venice_267	11.37	52	25	0.75	110	0	20
Venice_268	11.37	52	26	0.75	10	0	0
Venice_269	11.37	52	26	0.75	0	0	0
Venice_270	8.51	43	25	0.75	0	0	0
Venice_271	8.51	43	21.5	0.75	0	0	0
Venice_272	8.51	43	29	0.75	0	0	0
Venice_273	13.03	104	24	0.75	0	0	0
Venice_274	13.03	104	26	0.75	0	0	0
Venice_275	13.03	104	22	0.75	0	0	0
Venice_276	13.03	104	28	0.75	0	0	0
Venice_277	13.03	104	29	0.75	0	0	10
Venice_278	13.03	104	26	0.75	10	0	0
Venice_279	13.03	104	26	0.75	0	0	0
Venice_285	7.95	54	28	0.4	390	70	0
Venice_286	7.95	54	26	0.4	50	800	0
Venice_291	6.6	44	25	0.4	0	0	0
Venice_292	6.6	44	26	0.4	10	0	0
Venice_293	6.6	44	25	0.4	0	30	0
Venice_294	6.6	44	26	0.4	40	20	0
Venice_295	6.6	44	26	0.4	0	20	0
Venice_296	6.6	44	29	0.4	50	20	0
Venice_297	6.6	44	28	0.4	30	50	0
Venice_3	3.4	9	27.3	0.8	0	172	0
Venice_4	2.93	10	27.3	0.5	8	644	0
Venice_48	0.85	37	29.9	1.3	4	0	0
Venice_49	0.55	66	29.7	1.1	4	32	0
Venice_5	3.8	9	27.9	0.3	4	2760	0
Venice_50	1.34	19	29.6	0.7	4	0	0
Venice_51	1.04	17	29.6	1	0	212	0
Venice_52	1.15	26	29.5	0.7	4	1844	0
Venice_53	1.11	22	29.3	1	24	1432	0
Venice_54	2.26	7	29.5	0.5	8	804	28
Venice_55	0.99	23	29.1	1.1	48	536	0
Venice_56	0.95	38	29.2	0.5	24	2492	0
Venice_57	0.73	17	29.1	1.1	4	152	0
Venice_58	1.01	22	29.1	0.9	4	788	0
Venice_59	1.12	15	28.3	0.9	8	220	0
Venice_6	4.53	8	27.9	0.4	0	844	0
Venice_60	0.91	17	27.6	0.6	0	136	0
Venice_61	0.85	21	26.5	0.6	8	688	0
Venice_62	1.48	8	28.2	0.7	4	2288	0
Venice_63	0.95	17	28	0.3	0	1232	0
Venice_64	1.01	21	27.4	0.7	8	16	0
Venice_65	0.42	102	23	0.4	8	1120	0
Venice_66	0.7	47	24.7	0.5	0	2232	0
Venice_67	2	8	25.7	0.6	4	1852	0
Venice_68	1.53	13	28.5	1.2	16	0	0
Venice_69	2.62	12	27.9	0.9	0	0	0
Venice_7	4.31	8	28.1	0.4	0	384	0
Venice_70	1.49	23	29.2	1.1	32	4	0
Venice_71	3.59	9	28.4	0.8	0	4	0
Venice_72	1.53	18	29.6	1	24	0	0
Venice_73	1.32	15	29.6	0.7	20	0	0
Venice_74	1.45	17	29.6	0.6	120	12	0
Venice_8	4.19	9	28	0.4	4	1008	0
Venice_87	0.98	17	28.5	0.8	16	0	0
Venice_88	0.71	22	29.9	0.4	0	0	40
Venice_89	0.89	18	28.7	0.5	0	140	0
Venice_9	3.82	10	28.6	0.7	4	748	0
Venice_90	0.9	21	29.2	0.6	0	4	0
Venice_91	0.88	22	28.6	0.2	4	776	0
Venice_92	0.76	32	28.9	0.8	4	108	0
Venice_93	0.78	34	28.6	0.7	0	24	0
Venice_94	0.7	45	28.6	0.6	0	32	0
Venice_95	0.53	94	28.9	0.8	24	12	0
Venice_96	0.7	50	29.3	0.6	0	52	0

## Sheet: euhaline
Station	loi	d50	psu	depth	Cerastoderma_glaucum	Hediste_diversicolor	Neanthes_succinea
Sardinia_32	15.6	3.6	41.8	1.7	77.16	1249.99	0
Sardinia_33	14.1	2.5	41.9	1.8	123.456	478.392	0
Sardinia_34	15.6	3.4	41.9	1.9	138.888	46.296	0
Sardinia_35	18.3	3.7	41.3	1.6	92.592	0	0
Sardinia_36	31	4.3	41.3	1.9	185.184	15.432	0
Sardinia_37	25.3	14	41.1	2.2	46.296	0	0
Sardinia_38	31.6	3.8	36.9	2.2	15.432	0	0
Sardinia_39	22	2.8	32.8	1.9	61.728	46.296	0
Sardinia_40	29.1	3.9	36.6	1.8	15.432	30.864	15.432
Sardinia_43	18.2	6	30	1.8	61.728	92.592	0
Sardinia_44	17.1	6	36	1.9	92.592	185.184	0
Sardinia_45	23.4	8	36	1.6	385.8	0	0
Sardinia_46	26.5	6.5	38	1.8	15.432	0	0
Sardinia_47	42.1	11	38	2.2	15.432	0	0
Venice_10	2.99	15	30.3	0.8	0	248	0
Venice_100	0.49	37	32.8	0.9	4	8	0
Venice_101	0.91	36	32.4	1.1	0	384	0
Venice_102	1.12	18	32.3	1.6	0	104	0
Venice_103	0.61	158	33.4	0.9	8	16	0
Venice_104	1.23	55	31.4	1.8	8	0	0
Venice_105	0.55	18	33	1.4	4	96	0
Venice_106	0.64	233	31	1.2	48	0	0
Venice_107	0.58	49	32.2	1.6	0	0	0
Venice_108	1.36	29	32.6	1.7	0	16	0
Venice_109	0.85	51	32.1	1.6	0	0	0
Venice_11	1.63	19	31	0.6	0	1504	0
Venice_110	1.24	35	32.8	1.8	0	0	0
Venice_111	2.54	38	32.7	1.6	0	0	0
Venice_112	5.43	25	32.3	1.4	0	0	0
Venice_113	1.57	222	33.2	2	0	0	0
Venice_114	1.02	66	33.9	1.9	0	0	0
Venice_115	1.47	76	33.6	2	0	0	0
Venice_116	1.31	61	34.1	1.4	0	0	0
Venice_117	1.06	51	33.8	1.6	0	0	0
Venice_118	1.17	57	33.6	1.7	0	0	0
Venice_119	0.66	124	33.7	1.8	0	0	0
Venice_12	3.36	13	30.8	0.9	4	616	0
Venice_120	1.24	76	33.5	1.9	0	0	0
Venice_121	1.01	55	33.4	2.2	0	0	0
Venice_122	0.51	749	33.1	1.9	0	0	0
Venice_123	0.38	568	33.1	1.1	0	0	0
Venice_124	1.13	23	32.2	1.7	0	0	0
Venice_125	1.65	42	32	1.4	0	0	0
Venice_126	0.71	17	32.1	1.2	4	0	0
Venice_127	0.68	316	32.2	1.2	0	0	0
Venice_128	0.8	170	32.5	1.1	0	4	0
Venice_129	0.77	119	32.4	0.8	4	0	0
Venice_13	2.05	27	31.2	0.5	4	96	0
Venice_130	0.46	382	32.6	1	4	0	0
Venice_131	1.7	33	32.4	1	0	232	0
Venice_132	0.96	176	32.4	1.6	0	8	0
Venice_133	0.16	964	33	8	0	0	0
Venice_134	0.85	207	33.5	1.4	0	0	0
Venice_135	0.68	304	33.3	0.7	0	0	0
Venice_136	0.42	540	32.8	0.6	0	0	0
Venice_137	0.44	569	34	0.7	0	0	0
Venice_138	0.49	454	33.4	1.2	0	0	0
Venice_139	1.41	49	34.3	1.2	0	0	0
Venice_14	2.13	16	31.8	0.9	40	16	0
Venice_140	0.92	139	34	1.3	0	0	0
Venice_141	1.41	69	33.1	1.5	0	0	0
Venice_142	0.92	224	33.7	1	0	0	0
Venice_143	1.2	61	32.8	1.5	0	0	0
Venice_144	1.88	252	33.7	1.3	0	0	0
Venice_145	1.07	186	33.8	0.9	0	0	0
Venice_146	0.78	125	33.8	1.9	0	0	0
Venice_147	0.6	351	33.8	1.2	0	0	0
Venice_148	0.51	473	33.9	1.1	0	0	0
Venice_149	0.87	39	33.8	1.7	4	0	0
Venice_15	4.9	17	32.2	0.2	4	0	0
Venice_150	0.87	118	33.8	1.4	0	0	0
Venice_151	1.72	31	34.1	1.4	0	0	0
Venice_152	0.76	231	34.3	1.2	4	0	0
Venice_153	0.63	289	34.3	1	0	0	0
Venice_154	0.58	427	34.3	1.1	0	4	0
Venice_155	0.67	417	34.1	1.1	4	0	0
Venice_156	0.57	243	34	2	0	0	0
Venice_157	0.53	389	33.5	1.8	0	0	0
Venice_158	0.59	411	33.3	1.3	0	0	0
Venice_159	0.6	392	33.3	1.1	0	0	0
Venice_16	8.26	115	32.9	1.2	0	0	0
Venice_160	0.94	138	33.4	1.7	0	0	0
Venice_161	0.9	139	33.4	1.2	0	0	0
Venice_162	1.02	104	33.4	1.2	0	0	0
Venice_163	0.81	109	33.2	1.5	0	0	0
Venice_164	0.91	32	33.4	1.3	0	0	0
Venice_165	1.18	19	33.3	1.5	0	0	0
Venice_166	0.98	23	33.6	1.3	0	0	0
Venice_167	1.14	15	33.2	1.4	4	0	0
Venice_168	0.87	22	33.8	1.2	4	0	0
Venice_169	0.48	70	33.3	0.8	4	0	0
Venice_17	1.2	380	31.2	1	16	0	0
Venice_170	0.69	33	33.5	0.7	4	0	0
Venice_171	0.29	694	32.9	1.4	0	0	0
Venice_172	0.44	166	33	0.9	0	0	0
Venice_173	0.39	225	32.4	1	0	0	0
Venice_174	0.43	125	30.9	1.4	0	0	0
Venice_18	11.76	12	32.3	1	4	4	0
Venice_182	7.07	106	30	0.75	60	0	0
Venice_185	7.07	106	32	0.75	40	10	0
Venice_187	11.34	74	30	0.75	20	30	0
Venice_188	11.34	74	34	0.75	0	0	0
Venice_19	5.29	59	31.9	0.7	16	1148	0
Venice_192	4.24	57	30	0.75	0	0	0
Venice_193	4.24	57	33	0.75	0	0	0
Venice_196	4.24	57	31	0.75	60	1470	0
Venice_197	4.24	57	33	0.75	10	20	0
Venice_20	7.22	45	31.8	0.9	96	0	0
Venice_205	5.47	63	32	0.75	20	30	0
Venice_208	5.54	102	31	0.75	0	0	0
Venice_21	6.65	54	31.9	1	4	0	0
Venice_210	6.9	72	30	0.75	130	50	0
Venice_211	5	70	30.5	0.75	170	450	0
Venice_212	3.57	71	30	0.75	60	0	0
Venice_213	3.57	71	31	0.75	0	100	0
Venice_219	7.54	45	30	0.4	0	0	0
Venice_22	2.98	151	31.4	0.7	4	380	0
Venice_221	7.54	45	31	0.4	0	0	0
Venice_225	4.99	54	30	0.4	0	160	10
Venice_226	4.99	54	31	0.4	0	30	0
Venice_228	4.99	54	30	0.4	0	560	0
Venice_23	3.95	86	31.2	0.7	0	168	0
Venice_24	3.43	72	31.1	0.9	3556	4	0
Venice_25	3.87	30	31.2	0.8	0	188	0
Venice_256	16.51	81	30	0.4	0	0	0
Venice_26	3.62	34	30.9	1	1116	0	0
Venice_261	12.3	121	30	0.4	80	30	10
Venice_264	13.11	111	33	0.4	0	0	0
Venice_266	11.37	52	30	0.75	0	0	0
Venice_27	4.35	16	31.4	1.1	2292	0	0
Venice_28	5.39	8	31.7	0.5	496	288	0
Venice_280	13.03	104	30	0.75	10	350	0
Venice_281	13.03	104	31	0.75	0	510	0
Venice_284	7.95	54	35	0.4	70	80	20
Venice_287	7.95	54	32	0.4	40	140	0
Venice_288	5.71	53	30	0.4	20	350	0
Venice_289	5.71	53	32.5	0.4	0	120	0
Venice_29	1.4	94	31.9	0.6	64	580	0
Venice_290	5.71	53	34	0.4	0	40	0
Venice_298	6.6	44	33	0.4	80	120	0
Venice_299	6.6	44	36	0.4	0	220	0
Venice_30	6.47	8	31.6	0.4	48	996	0
Venice_31	2.57	9	32	0.9	12	208	0
Venice_32	0.74	109	31.8	0.5	52	120	4
Venice_33	0.46	292	31.8	1.1	104	144	0
Venice_34	0.41	455	31.8	0.6	64	0	0
Venice_35	0.94	112	32.2	0.7	48	12	0
Venice_36	0.35	249	32.2	0.6	96	0	0
Venice_37	10.06	5	32.7	1.8	4	248	0
Venice_38	2.92	34	31.4	1.1	108	0	0
Venice_39	9.72	67	32.5	2	4	0	0
Venice_40	1.24	152	33.6	1.6	0	0	0
Venice_41	1.86	107	32.8	1.6	0	0	0
Venice_42	0.84	170	30	0.9	8	156	0
Venice_43	0.95	33	30.7	1.6	4	4	0
Venice_44	0.52	442	30.3	1.5	0	4	0
Venice_45	0.85	21	30.7	1.5	4	0	0
Venice_46	0.93	30	31	1.3	0	0	0
Venice_47	0.84	59	30.2	1.3	8	12	0
Venice_75	1.21	7	30.3	1.2	92	0	0
Venice_76	0.91	11	30.9	1	84	0	0
Venice_77	0.91	12	31.4	0.5	0	0	0
Venice_78	0.7	16	31.2	0.9	4	0	0
Venice_79	0.62	27	31.3	1	16	16	0
Venice_80	0.82	14	31.7	0.8	36	0	0
Venice_81	0.71	15	31.6	0.6	0	0	0
Venice_82	0.64	23	31.8	0.7	0	0	0
Venice_83	0.92	15	30.1	1.1	0	0	0
Venice_84	0.68	14	32.4	0.6	0	0	0
Venice_85	0.68	18	32.5	0.8	0	0	0
Venice_86	0.8	25	32.3	0.6	4	0	0
Venice_97	0.76	46	30.3	1.3	4	0	0
Venice_98	0.25	204	30.9	0.9	0	16	0
Venice_99	0.74	44	32.6	0.9	8	344	0
